# Supplementary material for: Heterologous DNA Prime- Subunit Protein Boost with Chikungunya Virus E2 Induces Neutralizing Antibodies and Cellular-Mediated Immunity
Source: MDPI journal article supplement (doi:10.3390/ijms241310517), 2023-06-23
Supplement: s1 [file s1]

## Supplementary Material

**Table S1.** Brazilian Chikungunya isolates

|    | CHIKV Isolate                          | Accession Number<br>Genbank |
|----|----------------------------------------|-----------------------------|
| 1  | BHI3734/H804698                        | KP164568.1                  |
| 2  | BHI3741/H804705                        | KP164569.1                  |
| 3  | BHI3745/H804709                        | KP164570.1                  |
| 4  | RJ-IB1                                 | KY124328.1                  |
| 5  | RJ-IB5                                 | KY124329.1                  |
| 6  | Bahia08                                | KU940225.1                  |
| 7  | BR33                                   | KX228391.1                  |
| 8  | C302F/2016/BR                          | KY055011.1                  |
| 9  | CHIKV/ Homo_sapiens/Brazil/ 2016/ 35AP | KY704955.1                  |
| 10 | CHIKV/ Homo_sapiens/Brazil/ 2016/ 243  | KY704953.1                  |
| 11 | CHIKV/ Homo_sapiens/Brazil/ 2016/ 241  | KY704952.1                  |
| 12 | CHIKV/ Homo_sapiens/Brazil/ 2016/ 197  | KY704951.1                  |
| 13 | CHIKV/ Homo_sapiens/Brazil/ 2016/ 195  | KY704950.1                  |
| 14 | CHIKV/ Homo_sapiens/Brazil/ 2016/ 194  | KY704949.1                  |
| 15 | CHIKV/ Homo_sapiens/Brazil/ 2016/ 190  | KY704947.1                  |
| 16 | CHIKV/ Homo_sapiens/Brazil/ 2016/ 178  | KY704944.1                  |
| 17 | CHIKV/ Homo_sapiens/Brazil/ 2016/ 175  | KY704943.1                  |
| 18 | CHIKV/ Homo_sapiens/Brazil/ 2016/ 172  | KY704942.1                  |
| 19 | CHIKV/ Homo_sapiens/Brazil/ 2016/ 167  | KY704940.1                  |
| 20 | CHIKV/ Homo_sapiens/Brazil/ 2016/ 166  | KY704939.1                  |
| 21 | CHIKV/ Homo_sapiens/Brazil/ 2016/ 164  | KY704938.1                  |
| 22 | CHIKV/ Homo_sapiens/Brazil/ 2016/ 17AL | KY704935.1                  |
| 23 | CHIKV/ Homo_sapiens/Brazil/ 2016/ 14   | KY704934.1                  |
| 24 | CHIKV/Homo_sapiens/Brazil/2016/19      | KY704936.1                  |
| 25 | CHIKV/ Homo_sapiens/Brazil/ 2016/ 19AP | KY704954.1                  |
| 26 | CHIKV/ Homo_sapiens/Brazil/ 2016/ 188  | KY704946.1                  |
| 27 | TR206/H804187                          | KP164572.1*                 |
| 28 | AMA2798/H804298                        | KP164567.1*                 |
| 29 | PER160/H803609                         | KP164571.1*                 |
| 30 | RJ/CHIKV/2015                          | KU355832.1*                 |
| 31 | MT01                                   | MH823663.1                  |
| 32 | MT02                                   | MH823664.1                  |
| 33 | MT03                                   | MH823665.1                  |
| 34 | MT04                                   | MH823666.1                  |
| 35 | MT05                                   | MH823667.1                  |
| 36 | MT06                                   | MH823668.1                  |
| 37 | CHIKV/Human/Brazil/2015/AMA290         | MK121891.1                  |

|    |                                |            |
|----|--------------------------------|------------|
| 38 | CHIKV/Human/Brazil/2015/AMA291 | MK121892.1 |
| 39 | CHIKV/Human/Brazil/2015/AMA292 | MK121893.1 |
| 40 | CHIKV/Human/Brazil/2016/AMA293 | MK121894.1 |
| 41 | CHIKV/Human/Brazil/2017/AMA74  | MK121895.1 |
| 42 | CHIKV/Human/Brazil/2017/AMA346 | MK121896.1 |
| 43 | CHIKV/Human/Brazil/2017/AMA352 | MK121898.1 |
| 44 | CHIKV/Human/Brazil/2017/AMA354 | MK121899.1 |
| 45 | CHIKV/Human/Brazil/2017/AMA362 | MK121900.1 |
| 46 | CHIKV/Human/Brazil/2017/AMA364 | MK121901.1 |
| 47 | CHIKV/Human/Brazil/2017/AMA366 | MK121902.1 |
| 48 | CHIKV/Human/Brazil/2017/AMA368 | MK121903.1 |
| 49 | CHIKV/Human/Brazil/2017/AMA369 | MK121904.1 |
| 50 | CHIKV/Human/Brazil/2017/AMA379 | MK121906.1 |
| 51 | CHIKV/Human/Brazil/2017/AMA381 | MK121907.1 |
| 52 | BRZ-38_Brazil-RJ_2016/03/29    | MG649970.1 |
| 53 | BRZ-18_Brazil-RJ_2016/08/22    | MG649971.1 |
| 54 | BRZ-10_Brazil-RJ_2016/05/05    | MG649972.1 |
| 55 | BRZ-37_Brazil-RJ_2016/12/12    | MG649973.1 |
| 56 | BRZ-3_Brazil-RJ_2016/04/08     | MG649974.1 |
| 57 | BRZ-4_Brazil-RJ_2016/07/27     | MG649975.1 |
| 58 | BRZ-20_Brazil-RJ_2016/03/29    | MG649976.1 |
| 59 | BRZ-1_Brazil-RJ_2016/07/28     | MG649977.1 |
| 60 | BRZ-14_Brazil-RJ_2017/03/16    | MG649978.1 |
| 61 | BRZ-8_Brazil-RJ_2017/03        | MG649979.1 |
| 62 | BRZ-7_Brazil-RJ_2016/04/27     | MG649980.1 |
| 63 | BRZ-2_Brazil-RJ_2016/07/28     | MG649981.1 |
| 64 | BRZ-12_Brazil-RJ_2017/03/24    | MG649982.1 |
| 65 | BRZ-6_Brazil-RJ_2016/03/28     | MG649983.1 |
| 66 | CHK_5_Brazil-RJ_2015           | MG649984.1 |
| 67 | CHK_7_Brazil-RJ_2015           | MG649985.1 |
| 68 | BeAr849404                     | MK518395.1 |
| 69 | 10C                            | MH000706.1 |
| 70 | 7C                             | MH000705.1 |
| 71 | 6C                             | MH000704.1 |
| 72 | 5C                             | MH000703.1 |
| 73 | 4C                             | MH000702.1 |
| 74 | 2C                             | MH000700.1 |
| 75 | BeAr843521                     | MT526900.1 |
| 76 | BeAr843523                     | MT526901.1 |
| 77 | BeAr843528                     | MT526902.1 |
| 78 | BeAr843529                     | MT526903.1 |
| 79 | BeAr843544                     | MT526904.1 |

---

\* Asian genotype

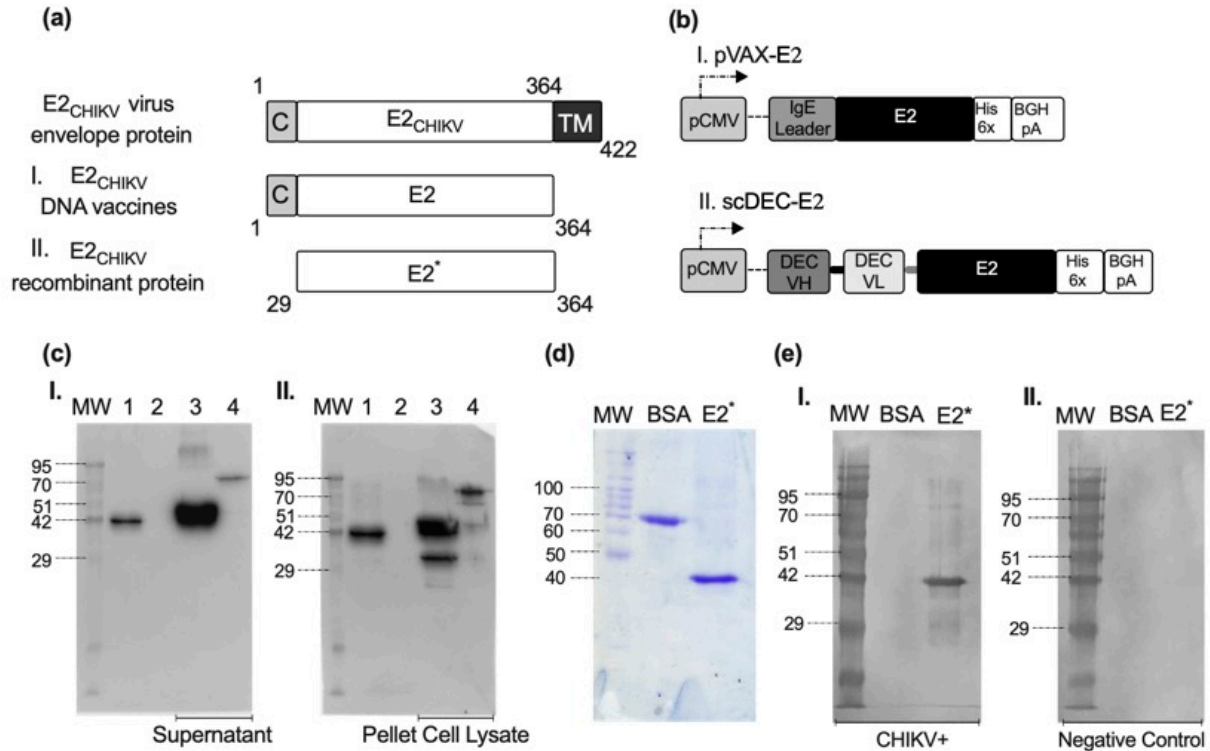

**Figure S1. Design and characterization of DNA vaccines and recombinant E2\* protein.** (a) E2<sub>CHIKV</sub> consensus was generated after alignment of Brazilian CHIKV isolate sequences and optimization for (I) eukaryotic cell expression without the transmembrane portion and (II) prokaryotic cell expression without the transmembrane and N-terminus region. C. cysteine N-terminus (aa 1-24). (b) Schematic representation of DNA vaccines: (I) pVAX-E2 and (II) scDEC-E2. (c) Immunoblotting analysis, under reducing conditions, of antigen expression after HEK293T transient transfection using serum from mice immunized with E2\* + poly (I:C). I. Supernatant; II. Cell lysate. 1. E2\*, 2. BSA, 3. pVAX-E2, 4. scDEC-E2. (d) SDS-PAGE analysis of the purified E2\* recombinant protein. (e) Immunoblot of E2\* using serum from (I) a convalescent CHIKV<sup>+</sup> or (II) a non-infected individual. MW: molecular weight. BSA: bovine serum albumin; sc: single chain; E2\* recombinant E2 protein lacking transmembrane and N-terminus region.

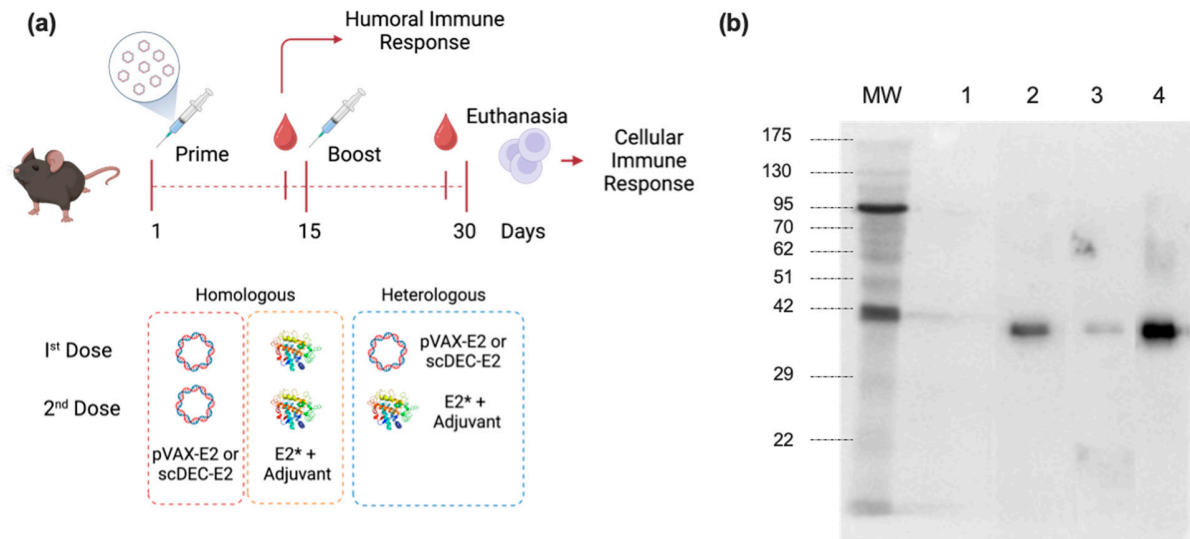

**Figure S2. Immunization with E2<sub>CHIKV</sub>-based vaccines induces specific antibodies.** (a) Immunization strategy. C57BL/6 mice were immunized intramuscularly twice with 100 µg of the non-targeted pVAX-E2 DNA vaccine or a DC-targeted scDEC-E2 DNA vaccine followed by electroporation, or with 10 µg of E2\* recombinant protein + adjuvant subcutaneously. Control group received the empty pVAX vector and adjuvant. Blood samples were collected 14 days after each immunization to evaluate humoral immune response and mice were euthanized 15 days after the last dose. (b) Recognition of E2\* under reducing conditions by pooled sera from immunized mice after boost. 1. pVAX/poly (I:C); 2. pVAX-E2; 3. scDEC-E2; 4. E2\*+poly (I:C).

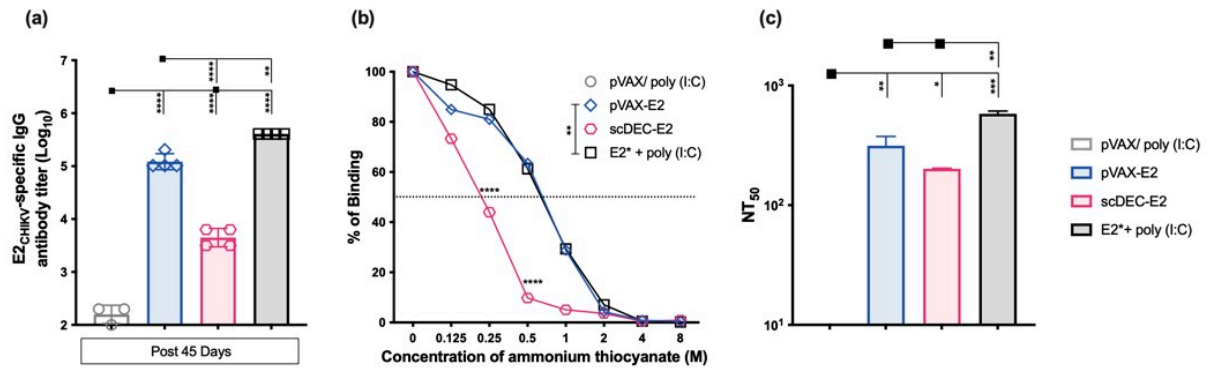

**Figure S3. Specific humoral immune response is sustained 45 days after immunization.** C57BL/6 mice were immunized as described in Figure 1. (a) Total E2\*-specific IgG titers. (b) Antibody affinity from pooled mouse sera after incubation with increasing concentrations of ammonium thiocyanate. (c) For PRNT, pooled sera were incubated with 100 PFU of CHIKV and NT<sub>50</sub> is displayed. Statistical analysis was performed by One-way ANOVA followed by Tukey post-hoc test. Data represent mean  $\pm$  SD. \* $p < 0.05$ , \*\* $p < 0.01$ , \*\*\* $p < 0.001$  and \*\*\*\* $p < 0.0001$ .

**Table S2.** Peptide library (20-mer overlapping 12) based on E2<sub>CHIKV</sub> consensus sequence.

| Number | Peptide               | Amino acid sequence   |
|--------|-----------------------|-----------------------|
| 1      | E2 <sub>1-20</sub>    | STKDNFNVYKATRPYLAHCP  |
| 2      | E2 <sub>11-30</sub>   | ATRPYLAHCPDCGEGHSCHS  |
| 3      | E2 <sub>21-40</sub>   | DCGEGHSCHSPVALERIRNE  |
| 4      | E2 <sub>31-50</sub>   | PVALERIRNEATDGTLKIQV  |
| 5      | E2 <sub>41-60</sub>   | ATDGTLKIQVSLQIGIKTDD  |
| 6      | E2 <sub>51-70</sub>   | SLQIGIKTDDSHDWTKLRYM  |
| 7      | E2 <sub>61-80</sub>   | SHDWTKLRYMDNHTPADAEER |
| 8      | E2 <sub>71-90</sub>   | DNHTPADAEERAGLFVRTSAP |
| 9      | E2 <sub>81-100</sub>  | AGLFVRTSAPCTITGTMGHF  |
| 10     | E2 <sub>91-110</sub>  | CTITGTMGHFILTRCPKGET  |
| 11     | E2 <sub>101-120</sub> | ILTRCPKGETLTVGFTDSRK  |
| 12     | E2 <sub>111-130</sub> | LTVGFTDSRKISHSCTHPFH  |
| 13     | E2 <sub>121-140</sub> | ISHSCTHPFHHDPPVIGREK  |
| 14     | E2 <sub>131-150</sub> | HDPPVIGREKFHSRPQHGKE  |
| 15     | E2 <sub>141-160</sub> | FHSRPQHGKELPCSTYVQST  |
| 16     | E2 <sub>151-170</sub> | LPCSTYVQSTAATTEEIEVH  |
| 17     | E2 <sub>161-180</sub> | AATTEEIEVHMPPDTPDRTL  |
| 18     | E2 <sub>171-190</sub> | MPPDTPDRTLMSQQSGNVKI  |
| 19     | E2 <sub>181-200</sub> | MSQQSGNVKITVNGQTVRYK  |
| 20     | E2 <sub>191-210</sub> | TVNGQTVRYKCNCGGSGNEGL |
| 21     | E2 <sub>201-220</sub> | CNCGGSGNEGLITTDKVINNC |
| 22     | E2 <sub>211-230</sub> | ITTDKVINNCKVDQCHAAVT  |
| 23     | E2 <sub>221-240</sub> | KVDQCHAAVTNHKKWQYNSP  |
| 24     | E2 <sub>231-250</sub> | NHKKWQYNSPLVPRNAELGD  |
| 25     | E2 <sub>241-260</sub> | LVPRNAELGDRKGKIHIPFP  |
| 26     | E2 <sub>251-270</sub> | RKGKIHIPFPLANVTCRVPK  |
| 27     | E2 <sub>261-280</sub> | LANVTCRVPKARNPTVTYGK  |
| 28     | E2 <sub>271-290</sub> | ARNPTVTYGKNQVIMLLYPD  |
| 29     | E2 <sub>281-300</sub> | NQVIMLLYPDHPTLLSYRNM  |
| 30     | E2 <sub>291-310</sub> | HPTLLSYRNMGEENYQEEW   |
| 31     | E2 <sub>301-320</sub> | GEENYQEEWVTHKKEVVL    |
| 32     | E2 <sub>311-330</sub> | VTHKKEVVLTVPTGLEVTW   |
| 33     | E2 <sub>321-340</sub> | VPTEGLEVTWGNNEPYKYWP  |
| 34     | E2 <sub>331-350</sub> | GNNEPYKYWPQLSTNGTAHG  |
| 35     | E2 <sub>341-360</sub> | QLSTNGTAHGHPHEIILYYY  |
| 36     | E2 <sub>351-364</sub> | HPHEIILYYYELYP        |

**Table S3.** E2<sub>CHIKV</sub> Peptide Matrix

| <b>Pool</b> | <b>Peptides</b> |    |    |    |    |    |    |    |    |
|-------------|-----------------|----|----|----|----|----|----|----|----|
| Pool 1      | 1               | 2  | 3  | 4  | 5  | 6  | 7  | 8  | 9  |
| Pool 2      | 10              | 11 | 12 | 13 | 14 | 15 | 16 | 17 | 18 |
| Pool 3      | 19              | 20 | 21 | 22 | 23 | 24 | 25 | 26 | 27 |
| Pool 4      | 28              | 29 | 30 | 31 | 32 | 33 | 34 | 35 | 36 |
| Pool 5      | 1               | 2  | 3  | 10 | 11 | 19 | 20 | 28 | 29 |
| Pool 6      | 4               | 5  | 12 | 13 | 21 | 22 | 30 | 31 | 32 |
| Pool 7      | 6               | 7  | 14 | 14 | 23 | 24 | 33 | 34 | 35 |
| Pool 8      | 8               | 9  | 16 | 17 | 18 | 25 | 26 | 27 | 36 |

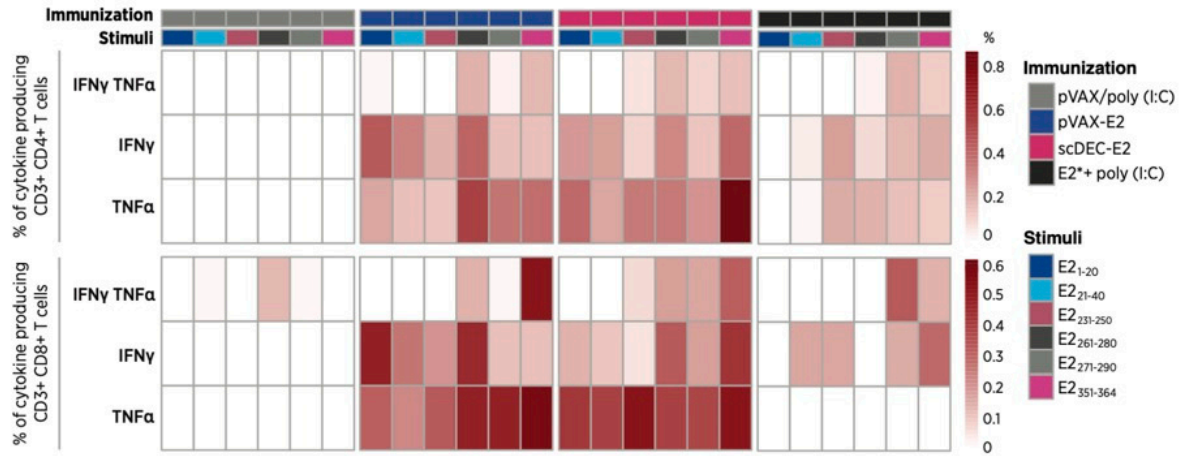

**Figure S4. Immunization with vaccines representing E2<sub>CHIKV</sub> induces cytokine-producing CD4<sup>+</sup> and CD8<sup>+</sup> T cells.** C57BL/6 mice were immunized as described in Figure 1. Fifteen days after boost, splenocytes were cultured for 12 hours in the presence of specific E2-peptides. Cells were then stained with anti-CD3, -CD4, -CD8, -IFN- $\gamma$  and -TNF- $\alpha$  and analyzed by flow cytometry. Heatmap showing the frequency of cytokine-producing T cells calculated by subtracting the values from non-stimulated cells. Dark red represents higher production of the cytokines. Boolean combinations were created using the FlowJo platform. Data are representative of 3 independent experiments.



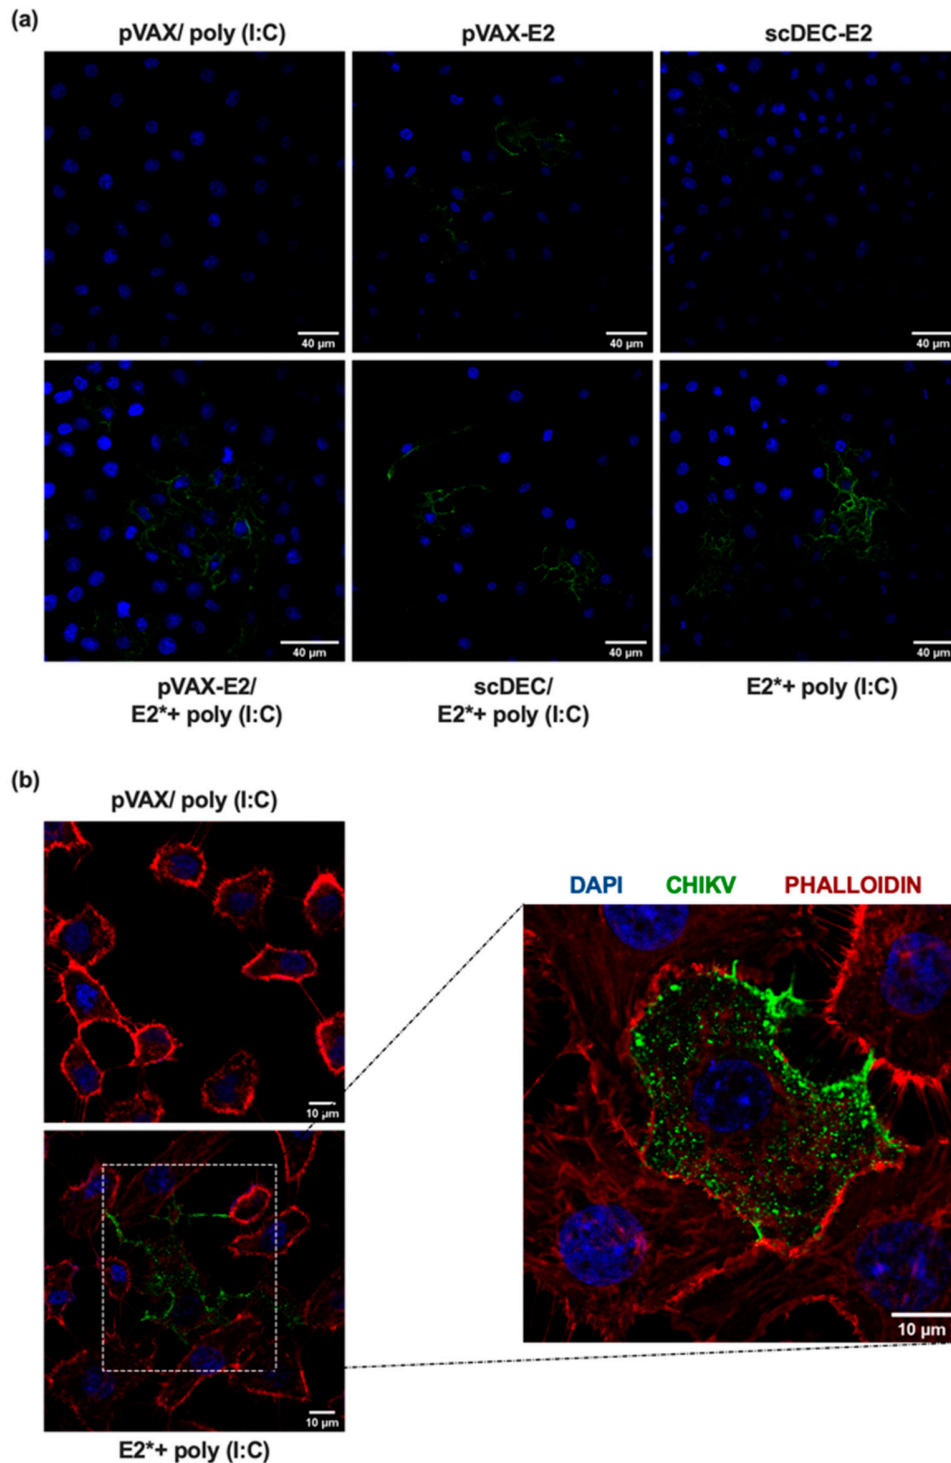

**Figure S5. Sera from immunized mice specifically recognized CHIKV infected cells *in vitro*.** Vero E6 cells were infected with CHIKV (MOI=0.1) for 20 hours, incubated with pooled sera from immunized mice followed by staining with (a) donkey-anti mouse IgG-Alexa Fluor 488 and DAPI or (b) donkey-anti mouse IgG-Alexa Fluor 488, DAPI and phalloidin-Texas red.

**Video S1. Sera from immunized mice specifically recognizes CHIKV in infected cells.**

Vero E6 cells were infected with CHIKV (MOI=0.1) and incubated for 20 hours with sera from E2\* + poly (I:C) immunized mice followed by staining with donkey anti-mouse IgG labeled with Alexa 488. Then, cells were labeled with DAPI and phalloidin. The images were acquired in a confocal microscope Leica-SP8. The Z-images were acquired with 0.15  $\mu\text{m}$  spacing between the sections.

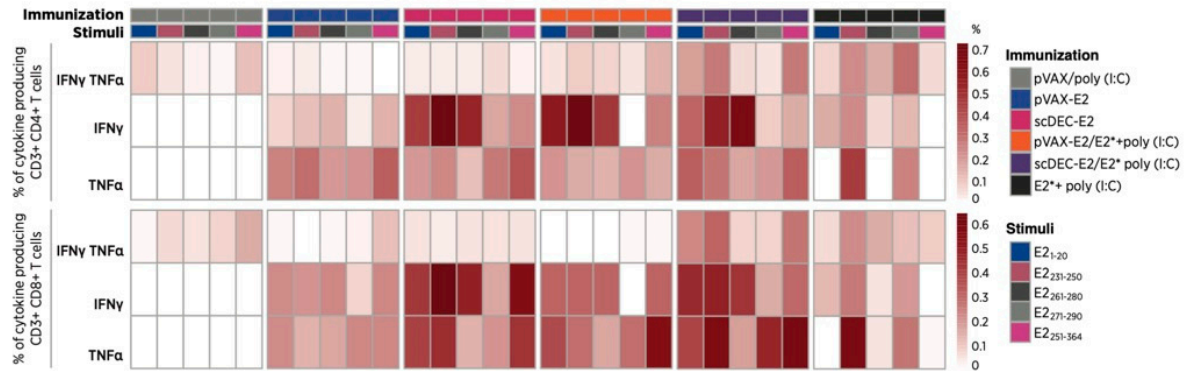

**Figure S6. Heterologous prime-boost immunization induces cytokine-producing CD4<sup>+</sup> and CD8<sup>+</sup> T cells.** C57BL/6 mice were immunized intramuscularly twice 15 days apart with 100 µg of the non-targeted pVAX-E2 DNA vaccine or a DC-targeted scDEC-E2 DNA vaccine followed by electroporation, or with 10 µg of E2\* recombinant protein + poly (I:C) subcutaneously. For heterologous prime-boost, mice received one dose of DNA vaccine (pVAX-E2 or scDEC-E2) followed by the E2\* recombinant protein + poly (I:C). The control group received the empty pVAX vector and poly (I:C). Fifteen days after boost, splenocytes were cultured for 12 hours in presence of specific E2-peptides. Cells were then stained with anti-CD3, -CD4, -CD8, -IFN-γ and -TNF-α and analyzed by flow cytometry. Heatmap showing the frequency of cytokine-producing T cells calculated by subtracting the values from non-stimulated cells. Dark red represents higher production of the cytokines. Boolean combinations were created using the FlowJo platform. Data are representative from 2 independent experiments.

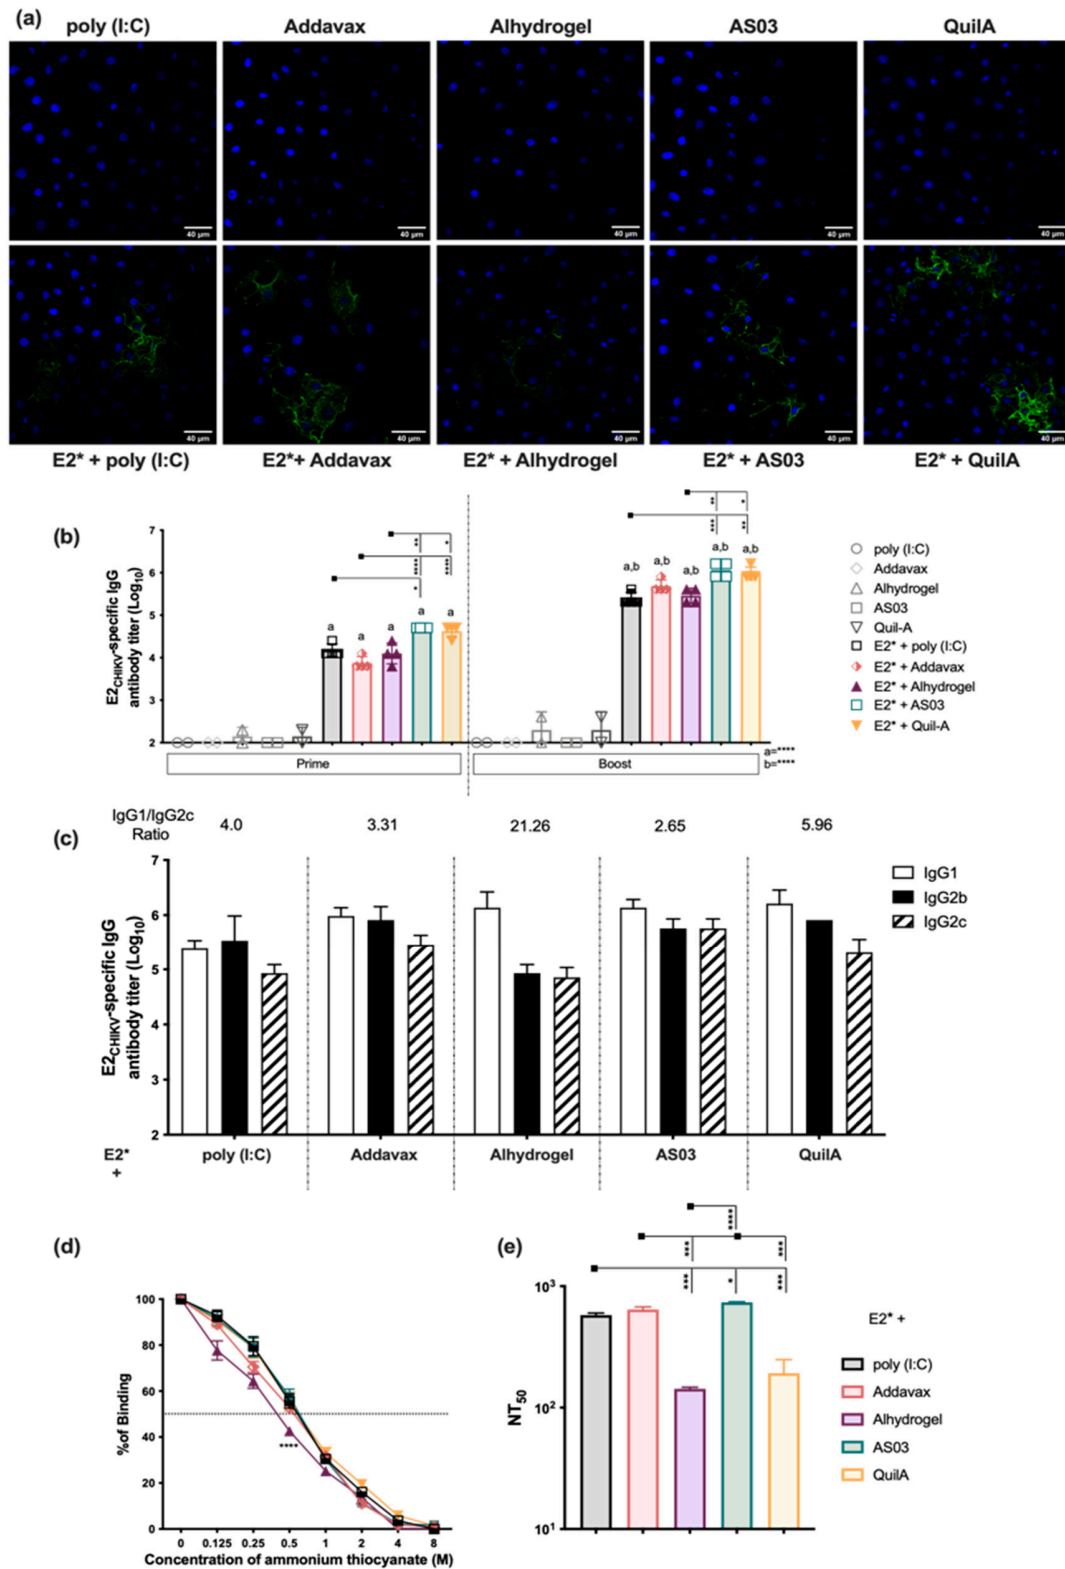

**Figure S7. Different adjuvants modulate the humoral immune response induced by E2\* immunization.** C57BL/6 mice received 2 doses subcutaneously with 10  $\mu$ g of E2\*

protein in the presence of poly (I:C), Addavax, Alhydrogel, AS03 or QuilA. Blood samples were collected 14 days after each immunization to evaluate humoral immune response. **(a)** Vero E6 cells were infected with CHIKV (MOI=0.1) for 20 hours and incubated with pooled sera from immunized mice followed by staining with donkey-anti mouse IgG-Alexa Fluor 488 and DAPI. **(b)** Total E2\*-specific IgG titers. a- statistical analysis in comparison to respective control group. b-statistical analysis in comparison to first dose. **(c)** E2\*-specific IgG subclasses after boost. **(d)** Antibody affinity from pooled mice sera after incubation with increasing concentrations of ammonium thiocyanate. **(e)** For PRNT, pooled sera were incubated with 100 PFU of CHIKV and NT<sub>50</sub> is displayed. Statistical analysis was performed by One-way ANOVA followed by Tukey post-hoc test. Data represent mean  $\pm$  SD. \*p<0.05, \*\*p<0.01, \*\*\*p<0.001 and \*\*\*\*p<0.0001.

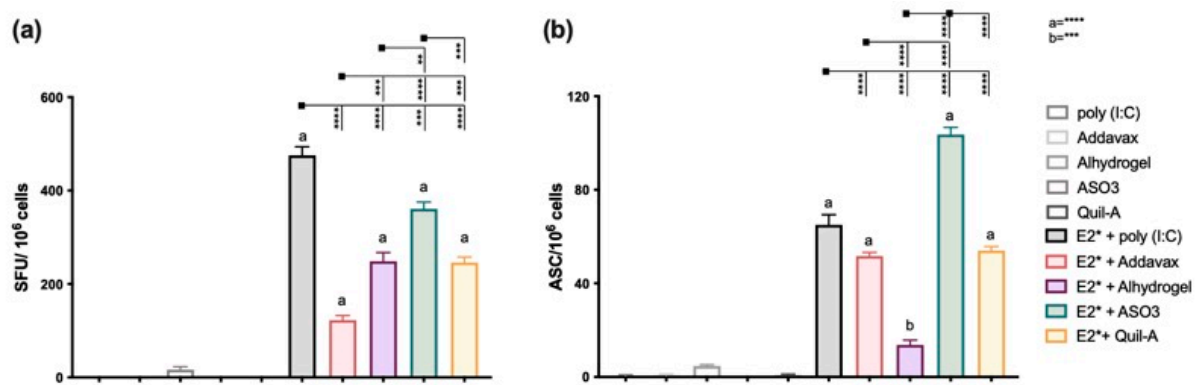

**Figure S8. Immunization with E2\* admixed with different adjuvants induces cellular immunity.** C57BL/6 mice received 2 doses subcutaneously with 10 $\mu$ g of E2\* protein in the presence of poly (I:C), Addavax, Alhydrogel, ASO3 or QuilA. Fifteen days after boost, mice were euthanized and spleen and draining lymph nodes were removed. (a) Specific IFN- $\gamma$  production was accessed by ELISpot against E2<sub>231-250</sub> peptide. SFU: spot forming units. (b) Draining lymph node cells were cultured with E2\* for 18 hours to evaluate the number of ASC by ELISpot assay. a,b statistics of immunized groups compared to respective adjuvant control group. Statistical analysis was performed by One-way ANOVA followed by Tukey post-hoc test. Data represent mean  $\pm$  SD. \*\*p<0.01, \*\*\*p<0.001 and \*\*\*\*p<0.0001.

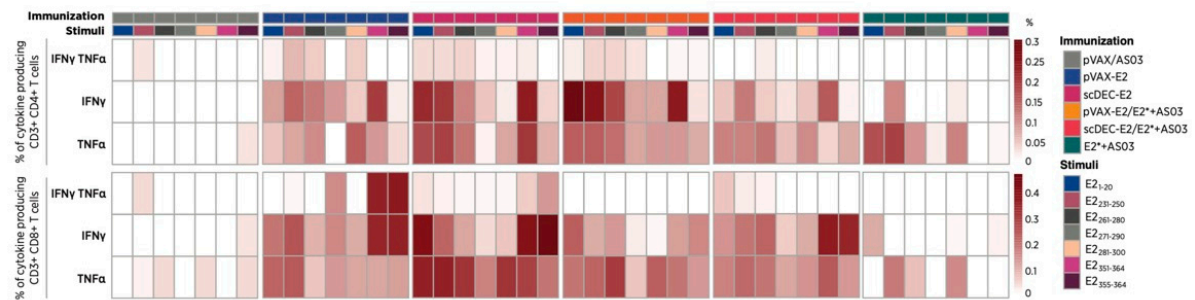

**Figure S9. Immunization with vaccines containing E2<sub>CHIKV</sub> induces cytokine producing T cells.** C57BL/6 mice were immunized as described in Figure 5. Fifteen days after boost, splenocytes were cultured for 12 hours in presence of specific E2-peptides. Cells were then stained with anti-CD3, -CD4, -CD8, -IFN- $\gamma$  and -TNF- $\alpha$  and analyzed by flow cytometry. Heatmap showing the frequency of cytokine-producing T cells was calculated by subtracting the values from non-stimulated cells. Dark red represents higher production of the cytokines. Boolean combinations were created using the FlowJo platform. Data represent mean  $\pm$  SD.

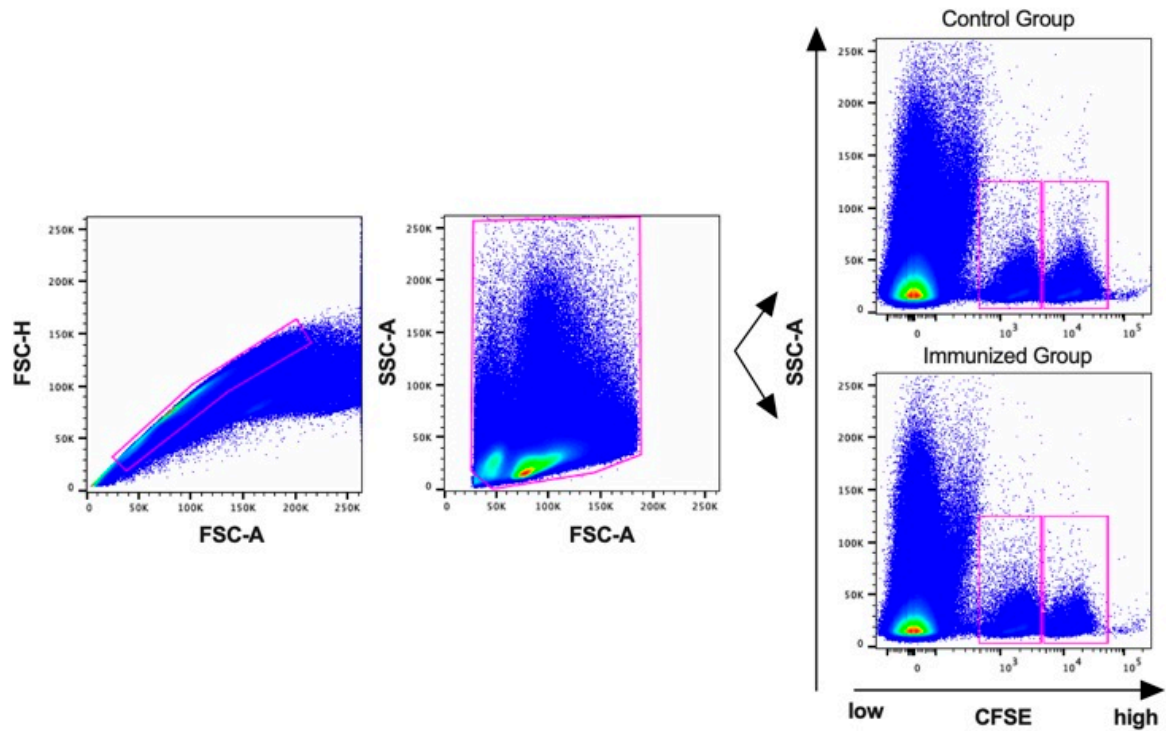

**Figure S10. Flow cytometry gating strategy of *in vivo* cytotoxicity.** C57BL/6 mice were immunized twice with 100  $\mu$ g of the non-targeted pVAX-E2 DNA vaccine or a DC-targeted scDEC-E2 DNA vaccine followed by electroporation, or with 10  $\mu$ g of E2\* recombinant protein + AS03 subcutaneously. For heterologous DNAprime-protein boost, mice received one dose of DNA vaccine (pVAX-E2 or scDEC-E2) followed by one dose of recombinant E2\* protein+ AS03. Control groups received the empty pVAX vector and poly AS03. Fifteen days after boost, *in vivo* CD8<sup>+</sup> T cell killing activity of target cells was evaluated after injection with syngeneic CFSE-labeled splenocytes pulsed with (CFSE<sup>high</sup>) or without (CFSE<sup>low</sup>) 1 $\mu$ g/mL of E2-specific peptide. One hundred thousand events were acquired inside the CFSE<sup>low</sup> gate.
